# Supplementary material
Source: PubMed Central journal article supplement (PMC10186208)
Supplement: jamapediatr-e231174-s001.pdf [file jamapediatr-e231174-s001.pdf]

## Supplemental Online Content

Huluta I, Wright A, Cosma LM, et al. Fetal cardiac function at midgestation in women who subsequently develop gestational diabetes. *JAMA Pediatr*. Published online May 15, 2023. doi:10.1001/jamapediatrics.2023.1174

**eTable.** Fitted regression models for each of the studied cardiac indices

This supplemental material has been provided by the authors to give readers additional information about their work.

eTable. Fitted regression models for each of the studied cardiac indices

| <b>FETAL CARDIAC INDEX</b>                               | <b>Estimate (95% CI)</b>           | <b>p-value</b> |
|----------------------------------------------------------|------------------------------------|----------------|
| <b>MORPHOMETRY</b>                                       |                                    |                |
| <b>Right ventricular sphericity index</b>                |                                    |                |
| Intercept                                                | 1.889968 (1.878309. 1.901628)      | <0.0001        |
| Maternal weight in kg - 69                               | -0.001395 (-0.002166. -0.000623)   | 0.0004         |
| Black                                                    | -0.034118 (-0.065039. -0.003196)   | 0.031          |
| In vitro fertilization – frozen embryo                   | -0.067516 (-0.119159. -0.015873)   | 0.010          |
| <b>Left ventricular sphericity index</b>                 |                                    |                |
| Intercept                                                | 2.176506 (2.157555. 2.195456)      | <0.0001        |
| In vitro fertilization – fresh embryo                    | -0.190047 (-0.320786. -0.059309)   | 0.004          |
| In vitro fertilization – frozen embryo                   | -0.185714 (-0.276882. -0.094546)   | <0.0001        |
| <b>Longitudinal left ventricular diameter (mm)</b>       |                                    |                |
| Intercept                                                | 5.228835 (3.551780. 6.905889)      | <0.0001        |
| Gestational age in days - 77                             | 0.110968 (0.087557. 0.134380)      | <0.0001        |
| <b>Transverse left ventricular diameter (mm)</b>         |                                    |                |
| Intercept                                                | 2.377344 (1.695809. 3.058880)      | <0.0001        |
| Gestational age in days - 77                             | 0.053759 (0.044245. 0.063273)      | <0.0001        |
| Maternal weight in kg - 69                               | 0.004479 (0.001733. 0.007224)      | 0.001          |
| In vitro fertilization – fresh embryo                    | 0.535173 (0.264858. 0.805488)      | 0.0001         |
| In vitro fertilization – frozen embryo                   | 0.759670 (0.571055. 0.948285)      | <0.0001        |
| <b>Longitudinal right ventricular diameter (mm)</b>      |                                    |                |
| Intercept                                                | -12.351718 (-21.735333. -2.968104) | 0.010          |
| Preeclampsia                                             | 0.421532 (0.143064. 0.700000)      | 0.003          |
| Gestational age in days - 77                             | 0.550456 (0.287681. 0.813230)      | <0.0001        |
| (Gestational age in days - 77)^2                         | -0.003048 ( -0.004886. -0.001211)  | 0.001          |
| In vitro fertilization – fresh embryo                    | 0.378225 (0.049841. 0.706609)      | 0.024          |
| In vitro fertilization – frozen embryo                   | 0.477538 (0.248044. 0.707031)      | <0.0001        |
| <b>Transverse right ventricular diameter (mm)</b>        |                                    |                |
| Intercept                                                | 2.055854 (1.456737. 2.654971)      | <0.0001        |
| Preeclampsia                                             | 0.288236 (0.086337. 0.490134)      | 0.005          |
| Hypothyroidism                                           | -0.267660 (-0.475347. -0.059972)   | 0.012          |
| Gestational age in days - 77                             | 0.057471 (0.049104. 0.065838)      | <0.0001        |
| Maternal weight in kg - 69                               | 0.004814 (0.002329. 0.007298)      | 0.0002         |
| Black race                                               | 0.144988 (0.045377. 0.244598)      | 0.004          |
| In vitro fertilization – fresh embryo                    | 0.340203 (0.101057. 0.579348)      | 0.005          |
| In vitro fertilization – frozen embryo                   | 0.499723 (0.332838. 0.666609)      | <0.0001        |
| SLE/APS                                                  | 0.938485 (0.242997. 1.633973)      | 0.008          |
| <b>Interventricular septal diameter in diastole (mm)</b> |                                    |                |
| Intercept                                                | 1.632639 (1.529699. 1.735578)      | <0.0001        |

|                                                       |                                   |         |
|-------------------------------------------------------|-----------------------------------|---------|
| GDM                                                   | 0.043397 (0.031181. 0.055612)     | <0.0001 |
| Hyperthyroidism                                       | -0.122472 (-0.216559. -0.028384)  | 0.011   |
| Gestational age in days - 77                          | 0.009395 (0.007943. 0.010846)     | <0.0001 |
|                                                       |                                   |         |
| <b>CONVENTIONAL DIASTOLIC INDICES</b>                 |                                   |         |
| <b>Mitral valve E (cm/sec)</b>                        |                                   |         |
| Intercept                                             | 23.160802 (20.554499. 25.767106)  | <0.0001 |
| Gestational age in days - 77                          | 0.101822 (0.065424. 0.138220)     | <0.0001 |
| Maternal weight in kg - 69                            | -0.024419 (-0.034654. -0.014185)  | <0.0001 |
| <b>Mitral valve A(cm/sec)</b>                         |                                   |         |
| Intercept                                             | 41.528400 (37.932636. 45.124163)  | <0.0001 |
| Gestational age in days - 77                          | 0.075824 (0.025592. 0.126056)     | 0.003   |
| Maternal weight in kg - 69                            | -0.026586 (-0.041073. -0.012099)  | 0.0003  |
| Black race                                            | 0.721461 (0.132520. 1.310402)     | 0.016   |
| <b>Mitral valve E/A</b>                               |                                   |         |
| Intercept                                             | 0.579580 (0.532889. 0.626270)     | <0.0001 |
| Hypothyroidism                                        | -0.021532 (-0.037290. -0.005773)  | 0.007   |
| Gestational age in days - 77                          | 0.001029 (0.000377. 0.001681)     | 0.002   |
| Maternal weight in kg - 69                            | -0.000203 (-0.000386. -0.000019)  | 0.031   |
| Parous. previous GDM                                  | -0.025194 (-0.046885. -0.003503)  | 0.023   |
| <b>E/e'</b>                                           |                                   |         |
| Intercept                                             | 15.434175 (13.782075. 17.086275)  | <0.0001 |
| Preeclampsia                                          | -6.097561 (-11.058297. -1.136825) | 0.016   |
| Gestational age at delivery with preeclampsia (weeks) | 0.151738 (0.021017. 0.282459)     | 0.023   |
| Heart rate                                            | -0.022658 ( -0.030824. -0.014492) | <0.0001 |
| Gestational age in days - 77                          | -0.022210 ( -0.037959. -0.006460) | 0.006   |
| Maternal age in years - 35                            | -0.015953 ( -0.028734. -0.003172) | 0.014   |
| <b>Left atrial area (cm2)</b>                         |                                   |         |
| Intercept                                             | 0.952544 (0.504637. 1.400451)     | <0.0001 |
| GDM                                                   | 0.040678 (0.036271. 0.045084)     | <0.0001 |
| Gestational age in days - 77                          | -0.022142 (-0.034727. -0.009558)  | 0.0006  |
| (Gestational age in days - 77)^2                      | 0.000187 (0.000099. 0.000275)     | <0.0001 |
| <b>Isovolumic relaxation time (sec)</b>               |                                   |         |
| Intercept                                             | 0.039383 (0.038555. 0.040211)     | <0.0001 |
| Preeclampsia                                          | 0.083566 (0.019793. 0.147340)     | 0.010   |
| Gestational age at delivery with preeclampsia (weeks) | -0.001953 (-0.003632. -0.000273)  | 0.023   |
|                                                       |                                   |         |
| <b>CONVENTIONAL SYSTOLIC INDICES</b>                  |                                   |         |
| <b>Myocardial performance index</b>                   |                                   |         |

|                                                         |                                     |         |
|---------------------------------------------------------|-------------------------------------|---------|
| Intercept                                               | 0.347393 (0.309180. 0.385605)       | <0.0001 |
| Gestational age in days - 77                            | 0.000774 (0.000241. 0.001308)       | 0.004   |
| Maternal weight in kg - 69                              | 0.000195 (0.000044. 0.000347)       | 0.011   |
| South Asian race                                        | -0.009971 (-0.019056. -0.000885)    | 0.032   |
| <b>Tricuspid annular plane systolic excursion (mm)</b>  |                                     |         |
| Intercept                                               | 2.001333 (1.657708. 2.344959)       | <0.0001 |
| Gestational age in days - 77                            | 0.028942 (0.024145. 0.033738)       | <0.0001 |
| <b>Ejection time (msec)</b>                             |                                     |         |
| Intercept                                               | 0.170219 (0.169548. 0.170891)       | <0.0001 |
| Maternal weight in kg - 69                              | -0.000058 (-0.000103. -0.000014)    | 0.011   |
| In vitro fertilization – fresh embryo                   | 0.004888 (0.000291. 0.009485)       | 0.037   |
| <b>SPECKLE TRACKING MEASURES</b>                        |                                     |         |
| <b>Right ventricular global longitudinal strain (%)</b> |                                     |         |
| Intercept                                               | -23.537167 (-25.689366. -21.384967) | <0.0001 |
| Gestational age in days - 77                            | 0.041710 (0.011683. 0.071738)       | 0.007   |
| <b>Left ventricular global longitudinal strain(%)</b>   |                                     |         |
| Intercept                                               | -23.840750 (-24.097904. -23.583597) | <0.0001 |
| Maternal weight in kg - 69                              | 0.025714 (0.008320. 0.043109)       | 0.004   |
| Maternal height in cm - 164                             | -0.038803 ( -0.073295. -0.004311)   | 0.028   |
| Maternal age in years - 35                              | 0.061688 (0.016641. 0.106735)       | 0.007   |
| In vitro fertilization – fresh embryo                   | 2.193264 (0.685600. 3.700927)       | 0.004   |
| In vitro fertilization – frozen embryo                  | 2.348666 (1.275848. 3.421483)       | <0.0001 |
| <b>Left ventricular ejection fraction (%)</b>           |                                     |         |
| Intercept                                               | 0.724669 (0.719272. 0.730066)       | <0.0001 |
| Preeclampsia                                            | -0.027025 (-0.052964. -0.001086)    | 0.041   |
| GDM                                                     | 0.018595 (0.002613. 0.034577)       | 0.023   |
| Maternal age in years - 35                              | -0.001096 (-0.001995. -0.000196)    | 0.017   |
| Black race                                              | -0.013617 (-0.026295. -0.000939)    | 0.035   |
| East Asian race                                         | -0.028700 (-0.055841. -0.001558)    | 0.038   |
| In vitro fertilization – fresh embryo                   | -0.044692 (-0.074742. -0.014643)    | 0.004   |
| In vitro fertilization – frozen embryo                  | -0.054826 (-0.076241. -0.033411)    | <0.0001 |

Intercept: constant in multiple regression

Reference categories were Outcome: No GDM or PE; Ethnicity: White; Method of conception: Spontaneous; Parity: Nullip; Auto-immune disease: No; Thyroid disease: No. Terms for gestational age, maternal weight and maternal age relate to a 1 unit increase in the given covariate (units are specified within the table).
