# Supplementary material
Source: PubMed Central journal article supplement (PMC10186208)
Supplement: jamapediatr-e231174-s002.pdf [file jamapediatr-e231174-s002.pdf]

## Data Sharing Statement

Huluta. Fetal Cardiac Function at Midgestation in Women Who Subsequently Develop Gestational Diabetes. *JAMA Pediatr.* Published May 15, 2023.

doi:10.1001/jamapediatrics.2023.1174

### Data

**Data available:** Yes

**Data types:** Data dictionary

**How to access data:** Data are stored in password protected computers at the University and can be made available upon request and pending Departmental approval. Please email

[marietta.charakida@kcl.ac.uk](mailto:marietta.charakida@kcl.ac.uk)

**When available:** With publication

### Supporting Documents

**Document types:** None

### Additional Information

**Who can access the data:** researchers whose proposed use of the data has been approved

**Types of analyses:** research purposes

**Mechanisms of data availability:** signed data access agreement
